# Supplementary figures and images for: Transcripts of unknown function in multiple-signaling pathways involved in human stem cell differentiation
Source: PubMed Central journal article supplement — Nucleic Acids Res. 2009 Jun 16;37(15):4987–5000. doi: 10.1093/nar/gkp426 (PMC2731886; doi:10.1093/nar/gkp426), 2009-06-16

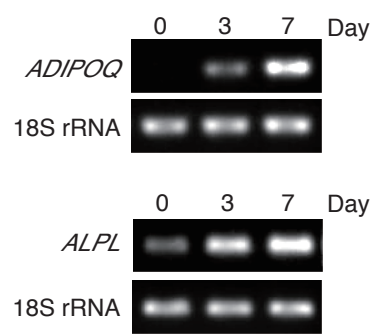

Kikuchi supplementary figure 1

Supplement: gkp426_1.pdf [file gkp426_1.pdf]

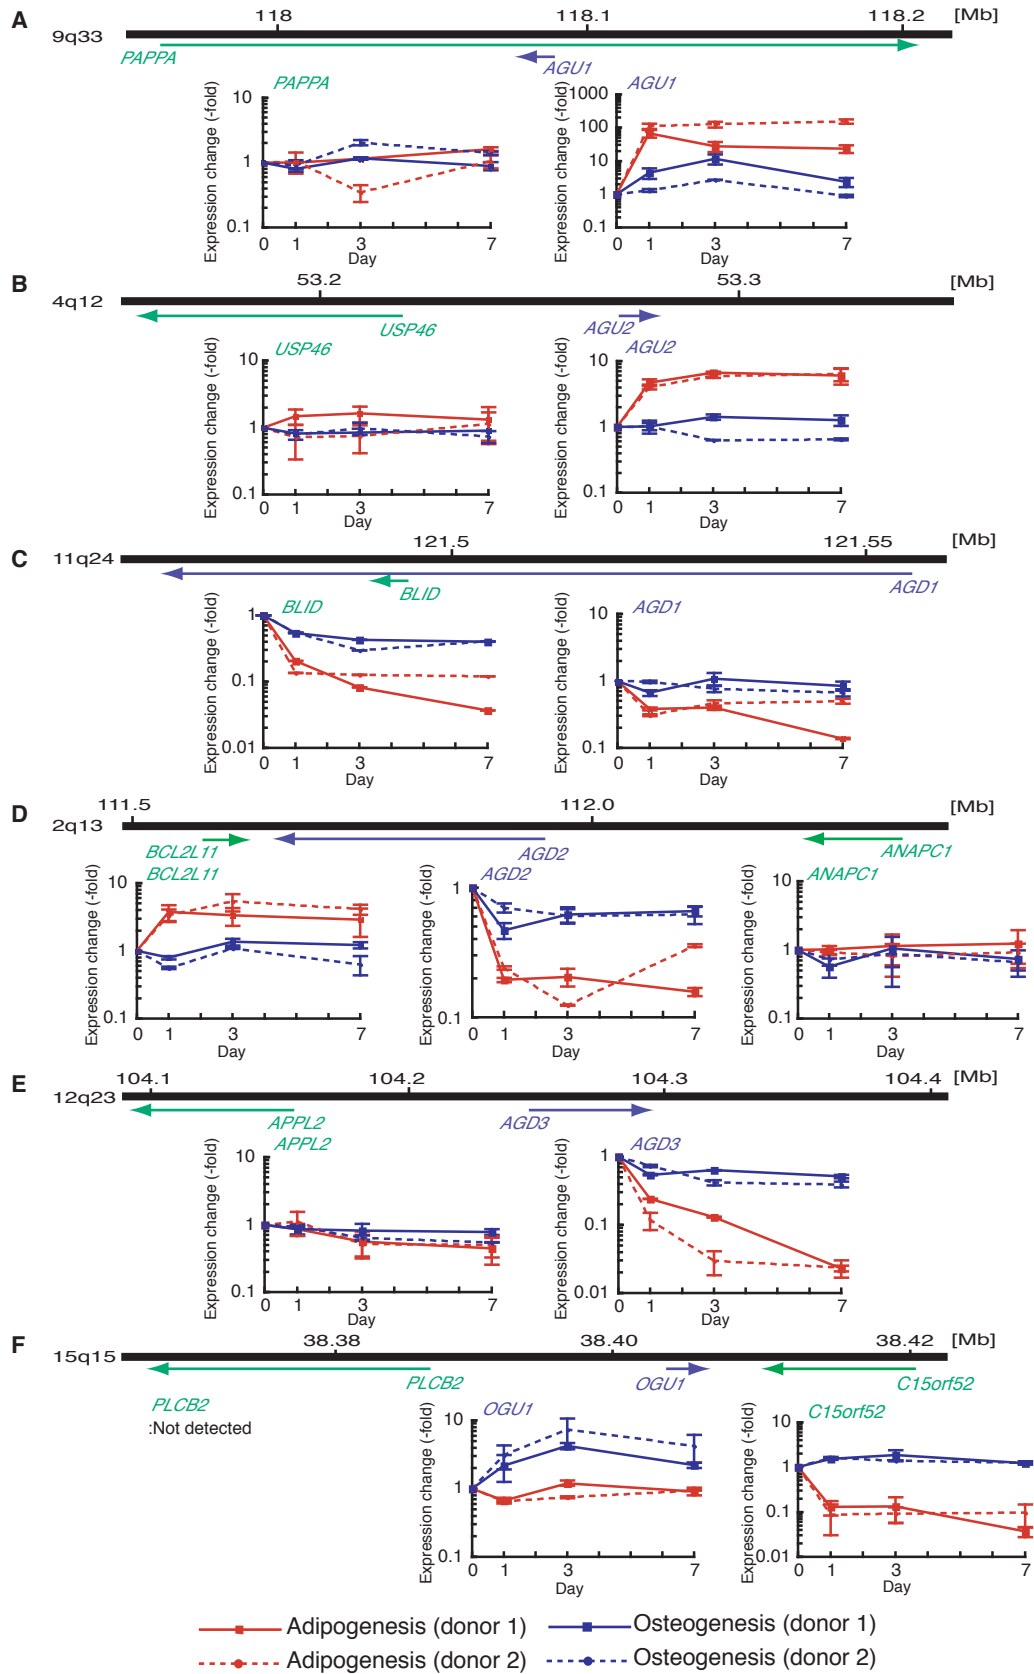

Kikuchi supplementary figure 2

Supplement: gkp426_2.pdf [file gkp426_2.pdf]

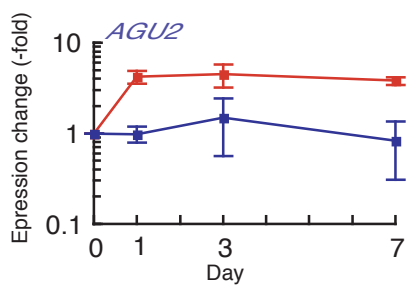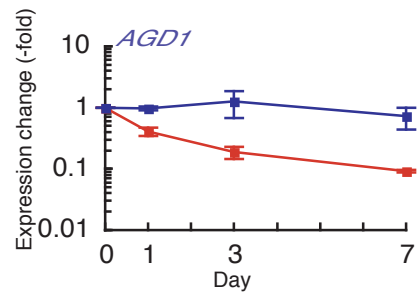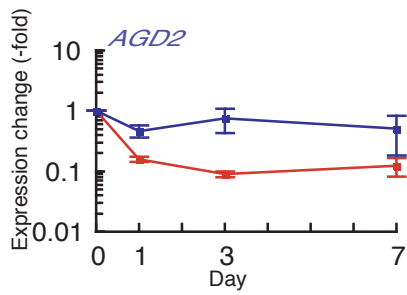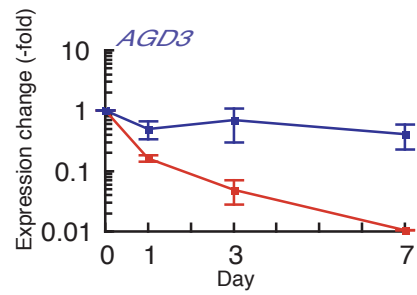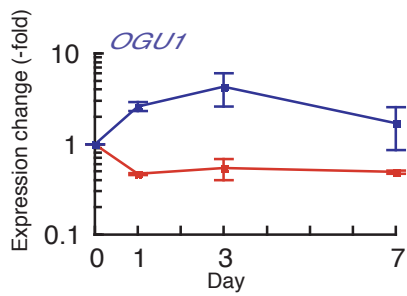

Kikuchi supplementary figure 3

Supplement: gkp426_3.pdf [file gkp426_3.pdf]

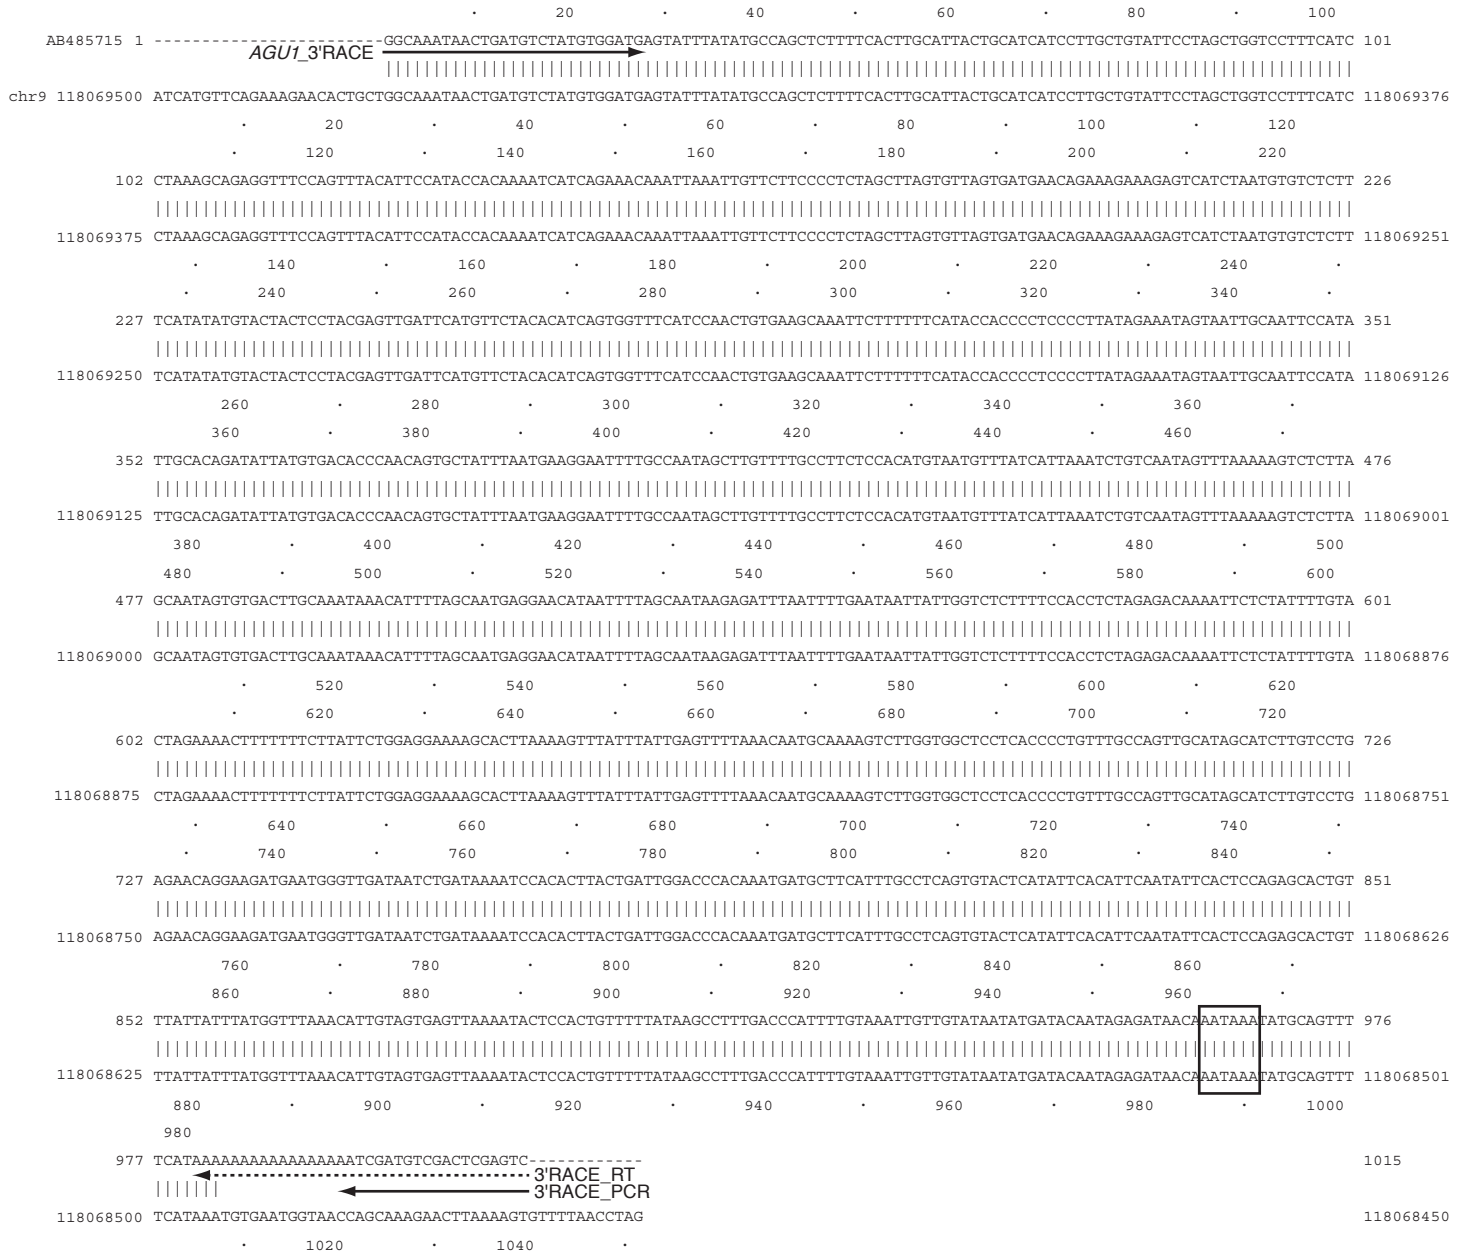

Kikuchi Supplementary Figure 4

Supplement: gkp426_4.pdf [file gkp426_4.pdf]

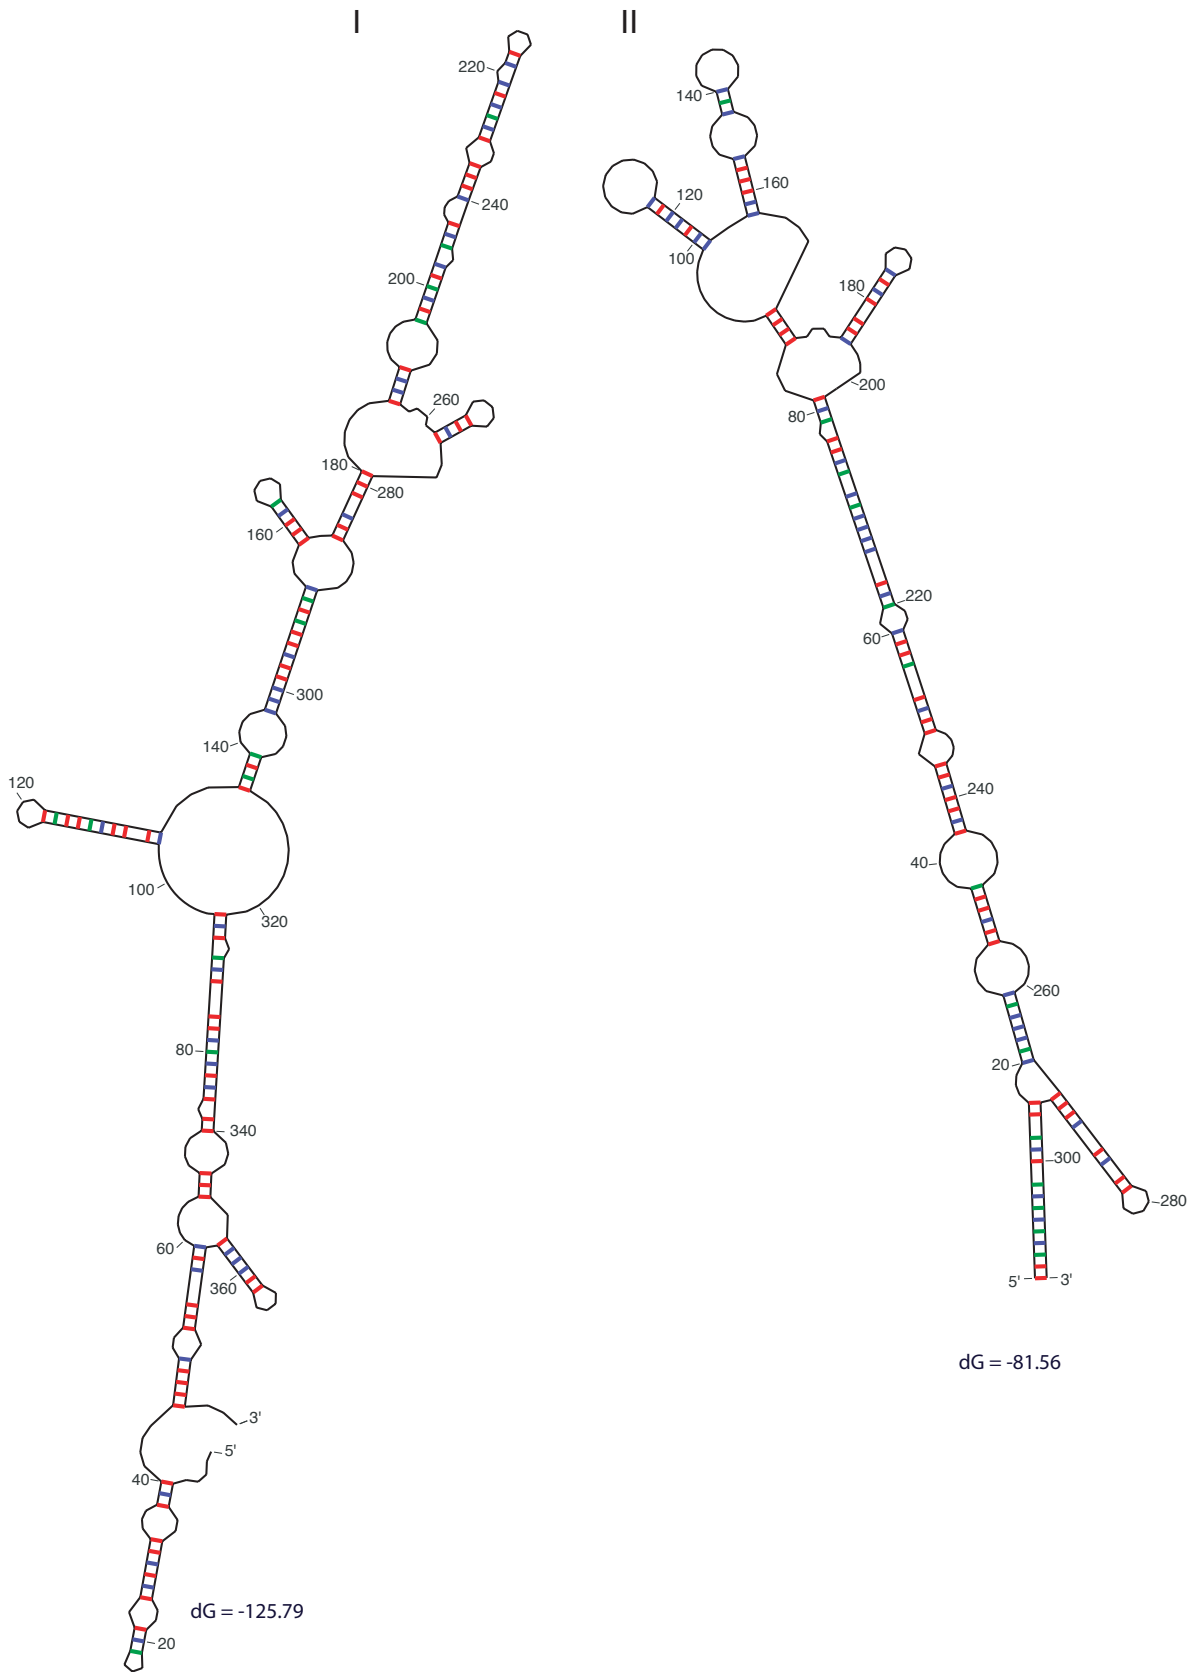

Kikuchi Supplementary Figure 5

Supplement: gkp426_5.pdf [file gkp426_5.pdf]
